# Supplementary material for: Overexpression of SPP1 is a prognostic indicator of immune infiltration in lung adenocarcinoma
Source: Aging (Albany NY). 2024 Feb 7;16(3):2953–77. doi: 10.18632/aging.205526 (PMC10911343; doi:10.18632/aging.205526)
Supplement: Supplementary Table 1 [file aging-16-205526-s002.xlsx]

## Sheet: Sheet1
Supplementary Table 1. Genes that are differentially expressed and associated with prognosis and immunity in the TCGA and ImmPort databases.
Gene	p-value
BIRC5	0.001
RAET1L	0.001
TNFSF11	0.002
ANOS1	0.003
GAL	0.003
CBLC	0.003
EREG	0.004
ADRB2	0.004
IL11	0.005
IL23A	0.005
FGF19	0.005
PCSK1	0.005
IL7R	0.006
AGER	0.007
INSL3	0.008
EDN3	0.009
INHA	0.01
VIPR1	0.011
LGR4	0.011
GDF10	0.013
RXFP1	0.015
ACKR1	0.018
HRG	0.019
SFTPD	0.019
CMTM5	0.02
CCL14	0.02
GHR	0.021
VEGFD	0.021
ADRB1	0.023
PTX3	0.023
MC4R	0.024
LBP	0.025
SEMA6D	0.025
NOX5	0.027
TEK	0.029
TSHR	0.033
SPP1	0.037
FGF20	0.038
BPIFB2	0.04
CAMP	0.041
HNF4G	0.041
RXFP2	0.048
NR5A1	0.048
S1PR1	0.048
DKK1	<0.001
VGF	<0.001
KL	<0.001
PTHLH	0.05
ANGPTL7	0.052
S100P	0.054
CD79A	0.06
CXCR2	0.065
IL36RN	0.069
ADM2	0.071
UMODL1	0.071
HNF4A	0.076
IL20RB	0.08
LCN6	0.082
IL33	0.088
S100A7	0.094
LCN2	0.094
FGFR4	0.094
PDIA2	0.095
FGF5	0.1
S100A3	0.1
FGF10	0.116
RXRG	0.117
RETNLB	0.119
RLN3	0.12
UCN2	0.134
IL17A	0.137
LCN15	0.137
FGR	0.138
OPRK1	0.139
MUC5AC	0.139
OLR1	0.142
CRLF1	0.146
GREM1	0.153
SLIT2	0.155
AGTR2	0.155
PRKCG	0.156
PPBP	0.158
IFNE	0.159
IL5RA	0.16
CSF3	0.161
INSL6	0.168
AGRP	0.169
FGF11	0.178
CNTFR	0.187
CXCL13	0.192
IL37	0.195
LHB	0.206
IL22RA2	0.208
OGN	0.221
ANGPT1	0.222
S100A2	0.222
SSTR1	0.225
GPER1	0.233
HTR3C	0.238
TUBB3	0.241
DUOX1	0.252
MASP1	0.253
ANGPTL1	0.26
IL17C	0.269
FGA	0.269
MSR1	0.286
PF4	0.286
GPR17	0.296
HTR3A	0.304
PGLYRP3	0.307
ANGPTL5	0.308
MCHR1	0.309
IL31RA	0.312
CST4	0.325
CALCB	0.331
REG1A	0.335
BDNF	0.34
IL1RL2	0.349
ARTN	0.352
SFTPA2	0.379
SFTPA1	0.383
FABP4	0.388
DES	0.389
CALCRL	0.391
MDK	0.391
EDNRB	0.405
NR0B1	0.406
PLAU	0.413
SAA1	0.42
SEMA6A	0.427
NDP	0.43
SEMA3G	0.434
LHCGR	0.434
RBP4	0.435
NR2E1	0.436
IL6	0.44
COLEC10	0.44
PGLYRP4	0.451
BPIFA1	0.452
BMP8A	0.465
IL19	0.485
NRG3	0.502
CCL25	0.52
ACVRL1	0.529
GDNF	0.534
RAC3	0.534
OPRD1	0.535
GCGR	0.537
TMPRSS6	0.549
MIA	0.55
PGLYRP1	0.555
ADCYAP1R1	0.582
LCN12	0.582
PROK2	0.597
MARCO	0.602
CCL23	0.616
CMTM2	0.617
HBEGF	0.62
AGT	0.624
CRHR1	0.636
CRABP2	0.637
ACKR4	0.65
NR4A3	0.66
BPIFA2	0.662
BPIFB4	0.664
PLXNB3	0.668
CXCL2	0.683
NPR1	0.684
CGA	0.688
GFAP	0.71
ANGPT4	0.713
CXCR1	0.714
GALR3	0.737
CRABP1	0.742
LTBP4	0.761
RETN	0.771
EGF	0.771
OBP2A	0.775
INSL4	0.791
TFR2	0.796
NTS	0.798
CCL24	0.801
CALCA	0.809
IL36G	0.812
AVPR1B	0.818
CXCL14	0.842
KNG1	0.852
FPR2	0.853
ANGPTL3	0.856
OXT	0.862
IL1RL1	0.862
TNFRSF18	0.876
MTNR1A	0.879
FGF2	0.88
FABP7	0.885
CLEC4M	0.887
SAA2	0.892
ALB	0.901
TGFBR3	0.908
CHGB	0.912
RBP2	0.914
SEMA5A	0.922
PROC	0.94
EDN1	0.949
MMP12	0.969
FCGR3B	0.981
THPO	0.983
MUC4	0.988
PAEP	0.998
PRLH	Unable to detect
CGB3	Unable to detect
FGF21	Unable to detect
OPRM1	Unable to detect
GCG	Unable to detect
PRLHR	Unable to detect
IAPP	Unable to detect
DEFB126	Unable to detect
SLURP1	Unable to detect
BMP15	Unable to detect
GH2	Unable to detect
CRH	Unable to detect
IFNK	Unable to detect
HTR3B	Unable to detect
MCHR2	Unable to detect
SST	Unable to detect
GIP	Unable to detect
SSTR5	Unable to detect
DEFA4	Unable to detect
BPIFB6	Unable to detect
TCHHL1	Unable to detect
IFNL2	Unable to detect
S100A7A	Unable to detect
BPIFC	Unable to detect
GAST	Unable to detect
CGB5	Unable to detect
IFNL3	Unable to detect
FABP12	Unable to detect
LCN8	Unable to detect
CGB8	Unable to detect
DEFA3	Unable to detect
GDF2	Unable to detect
